# Supplementary material for: Foveal Hypoplasia in CRB1-Related Retinopathies
Source: MDPI journal article supplement (doi:10.3390/ijms241813932), 2023-09-11
Supplement: s1 [file s1]

## Supplemental Material

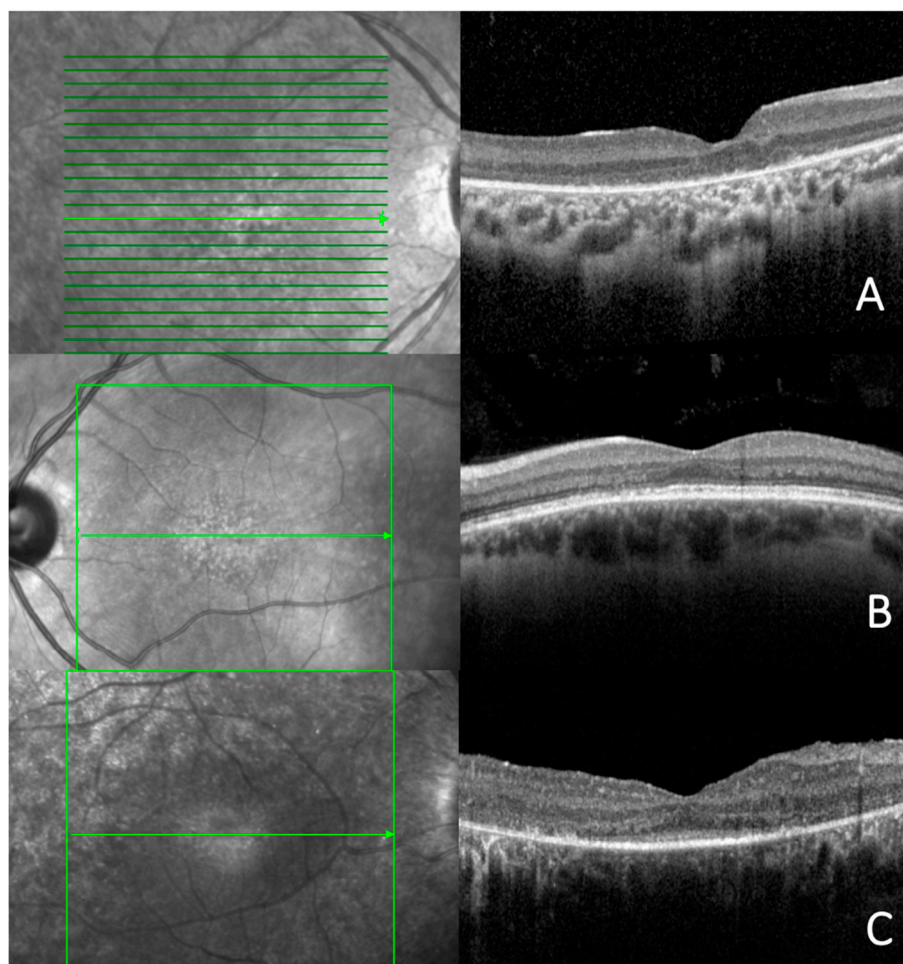

**Supplemental Figure S1.** Multimodal imaging in representative patients with FH.  
(A) Grade 1a FH (B) Grade 1b FH (C) Grade 1b FH.
